# Supplementary material for: Association between visceral fat and bone mineral density in perimenopausal women
Source: PeerJ. 2025 Feb 13;13:e18957. doi: 10.7717/peerj.18957 (PMC11830370; doi:10.7717/peerj.18957)
Supplement: Supplemental Information 1 [file peerj-13-18957-s001.xlsx]

## Sheet: raw data
Age	nation	site	education	family history of diabetes	Family history of osteoporosis	Family history of fracture	milk	VD intake	calcium	sunlight(min)	Age at menarche	Mode of delivery	BMD	BMD	VD	Perimenopausal	height	weight	BMI	body fat％	visccal fat area
40	Han	City	college	0	0	0	0	0	0	>30	≥17	Caesarean	0	-0.2	23.15	0	1.59	54.1	21.4	29.5	92
40	Han	City	>post-graduate	0	1	0	1	0	0	<30	≤12	Eutocia	1	-1.72	12.23	0	1.56	59.1	24.29	32.5	112
40	Han	rural	>post-graduate	0	0	0	1	1	1	>30	13-16	Eutocia	0	0.71	13.33	0	1.62	59.2	22.56	30.9	90
40	other	City	senior	0	0	0	1	0	0	<30	13-16	Caesarean	2	-2.8	9.12	0	1.49	57.2	25.76	35.6	129
40	Han	City	college	0	0	0	0	0	0	>30	13-16	Eutocia	0	-0.3	23.88	0	1.58	58.3	23.35	31.8	98
40	Han	City	>post-graduate	0	0	0	1	1	1	>30	≤12	Eutocia	0	0.34	16.68	0	1.58	59.6	23.87	32.4	100
40	other	City	college	0	0	0	1	0	0	<30	13-16	Eutocia	0	-0.23	19.01	0	1.59	54.3	21.48	29.6	96
41	Han	City	>post-graduate	0	0	1	0	0	0	>30	13-16	Eutocia	0	0.32	24.55	0	1.62	57.2	21.8	30.2	92
41	Han	City	<junior	0	0	0	1	0	0	<30	13-16	Caesarean	0	-0.5	18.34	0	1.59	61.1	24.17	33	102
41	Han	City	college	0	0	0	1	0	0	>30	≥17	Eutocia	0	0.31	29	0	1.55	53.2	22.14	30.6	92
41	Han	City	college	0	0	0	0	0	0	<30	13-16	Eutocia	0	-1	9.15	0	1.65	60.1	22.08	30.5	98
41	other	City	<junior	0	0	0	1	0	0	>30	≤12	Eutocia	0	1	40.12	0	1.63	62.1	23.37	32.1	100
41	Han	City	college	0	0	0	1	0	0	<30	13-16	Caesarean	0	-0.45	19.23	0	1.57	54.3	22.03	30.5	98
41	Zhuang	City	college	0	0	0	1	1	1	>30	13-16	Eutocia	0	-0.24	28.98	0	1.6	59.2	23.13	31.8	94
41	Han	City	<junior	1	0	0	0	0	1	<30	≤12	Caesarean	1	-1.65	16.22	1	1.6	61.1	23.87	32.4	108
41	Han	City	<junior	0	0	0	1	0	0	<30	≥17	Eutocia	0	-0.23	17.67	0	1.6	54.4	21.25	29.5	89
41	Han	City	college	0	0	1	1	0	0	>30	≥17	Eutocia	0	0.23	29.12	1	1.56	54.2	22.27	30.8	96
41	Han	City	college	0	0	0	1	0	0	>30	13-16	Eutocia	0	-0.52	24.23	0	1.59	53.1	21	29.2	90
41	other	City	senior	0	1	0	1	0	1	<30	13-16	Eutocia	0	0.45	19.23	1	1.57	68.3	27.71	37.3	123
42	Han	City	senior	0	1	0	0	0	0	<30	13-16	Eutocia	0	-0.86	7.23	0	1.62	60.5	23.05	31.9	98
42	Han	City	>post-graduate	0	0	0	1	0	0	>30	≤12	Eutocia	0	0.41	26.44	0	1.59	54.2	21.44	30	97
42	Han	City	<junior	0	0	0	1	0	0	<30	13-16	Caesarean	0	-0.9	12.34	0	1.56	53.3	21.9	30.5	100
42	Han	City	college	0	0	0	1	0	1	>30	13-16	Eutocia	0	0.22	27.23	0	1.52	53.5	23.16	32	100
42	other	City	senior	0	0	0	1	0	0	<30	13-16	Eutocia	0	-0.31	16.2	0	1.49	56.4	25.4	34.7	103
42	Han	City	<junior	0	0	0	1	1	0	>30	13-16	Eutocia	0	-0.36	28.22	0	1.66	47.4	17.2	24.9	90
42	Han	City	senior	0	0	0	1	0	0	<30	≥17	Eutocia	0	-0.7	11.26	0	1.71	66.8	22.84	31.7	96
42	Zhuang	City	senior	0	0	0	1	0	0	>30	13-16	Eutocia	0	0.2	30.22	0	1.58	58.5	23.43	32.4	100
42	Han	City	college	0	0	0	1	0	0	<30	13-16	Eutocia	0	-0.34	19.34	0	1.59	56.4	22.31	31	101
42	Han	City	college	0	0	0	0	0	0	>30	≤12	Caesarean	0	-0.9	23.44	0	1.57	43.5	17.65	25.4	89
42	Han	City	college	0	0	0	1	0	0	<30	13-16	Eutocia	0	-0.66	16.33	0	1.7	60.9	21.07	29.5	90
42	Han	City	>post-graduate	0	0	0	1	0	0	>30	13-16	Eutocia	2	-2.6	29.13	0	1.55	59.3	24.68	32	118
42	Han	City	<junior	0	0	0	1	0	1	<30	≤12	Caesarean	2	-3	9.24	0	1.6	61.1	23.87	36.1	129
42	Han	City	<junior	0	0	0	1	0	0	>30	13-16	Eutocia	0	-0.21	28.33	0	1.49	49.7	22.39	31.1	90
42	Han	City	senior	0	0	0	1	1	1	<30	≥17	Caesarean	0	0.38	25.55	1	1.58	56.5	22.63	31.4	92
42	Han	City	college	0	0	0	0	1	1	<30	13-16	Caesarean	1	-1.2	18.89	0	1.62	52.6	20.04	27.1	95
42	Han	City	college	0	0	0	1	0	0	>30	13-16	Eutocia	0	-0.5	27.22	0	1.59	53	20.96	29.4	94
42	Han	City	>post-graduate	0	0	0	1	0	0	<30	≥17	Caesarean	0	0.23	19.34	0	1.59	57.2	22.63	31.4	98
43	Zhuang	City	college	0	0	0	1	0	0	>30	13-16	Eutocia	0	-0.4	32.44	0	1.57	50.3	20.41	29	92
43	Han	City	senior	0	0	0	1	0	0	<30	13-16	Caesarean	1	-1.5	8.24	0	1.61	46.5	17.94	25.1	90
43	Han	City	senior	0	0	0	1	0	0	>30	13-16	Eutocia	0	-0.56	12.33	1	1.59	58.3	23.06	32.2	98
43	Han	City	college	0	0	0	1	0	0	>30	13-16	Eutocia	0	-0.1	23.66	0	1.46	60.8	28.52	38.7	120
43	other	City	college	0	1	0	1	0	0	<30	13-16	Eutocia	0	-0.66	14.28	0	1.59	58	22.94	32	94
43	Han	City	college	0	0	0	0	1	1	<30	13-16	Caesarean	0	0.1	18.34	0	1.59	57.8	22.86	31.9	95
43	Zhuang	City	senior	0	0	0	0	0	1	>30	≤12	Eutocia	1	-1.62	9.12	1	1.52	41.9	18.14	25.3	85
43	Han	City	senior	0	0	0	1	0	0	>30	≤12	Eutocia	0	0.2	26.34	0	1.58	57.9	23.19	32.3	98
43	Han	City	>post-graduate	0	0	0	1	0	1	<30	13-16	Eutocia	1	-1.78	9.24	1	1.54	57.6	24.29	36.8	123
43	other	City	college	0	0	0	1	0	0	<30	≥17	Caesarean	0	0.23	19.67	1	1.56	57.6	23.67	32.9	96
43	Han	City	>post-graduate	0	0	1	1	0	0	<30	13-16	Caesarean	0	-0.56	9.34	0	1.56	58.5	24.04	33.3	102
43	Han	City	college	0	0	0	1	0	0	<30	13-16	Eutocia	0	-0.44	16.6	0	1.59	56.7	22.43	31.4	98
43	Han	City	college	0	0	0	1	0	0	<30	≥17	Eutocia	0	-0.22	17.2	0	1.59	58.7	23.22	32.4	94
43	Han	City	<junior	0	0	0	1	0	0	>30	13-16	Caesarean	0	0.6	34.12	0	1.58	53.5	21.43	30.2	92
43	other	City	college	0	0	0	1	0	0	<30	13-16	Eutocia	1	-2.2	8.36	0	1.55	56.3	23.43	30	98
43	Han	City	college	0	0	0	0	0	0	>30	13-16	Eutocia	0	-0.9	14.44	0	1.61	58.6	22.61	31.6	89
43	Han	City	senior	0	0	0	1	1	1	<30	≤12	Caesarean	0	0.21	13.46	0	1.68	55.4	19.63	28	85
43	Han	City	college	0	0	0	1	0	0	<30	13-16	Caesarean	0	-0.33	12.11	0	1.57	56.1	22.76	31.8	70
43	Han	City	college	0	0	0	1	0	0	>30	13-16	Caesarean	0	0.32	24.34	0	1.58	56.5	22.63	31.6	75
43	other	City	college	0	0	1	1	1	0	>30	13-16	Eutocia	1	-1.2	36.22	1	1.53	60.7	25.93	38.1	121
43	Han	City	college	0	0	0	1	1	0	<30	13-16	Eutocia	0	0.29	18.99	0	1.55	58.7	24.43	33.8	98
43	Han	City	<junior	0	0	0	1	0	0	<30	13-16	Caesarean	0	-0.89	17.34	0	1.58	59.6	23.87	33.1	80
43	Han	City	college	0	0	0	0	0	0	>30	13-16	Eutocia	0	-0.4	18.33	0	1.56	58.7	24.12	33.4	86
43	Han	City	college	1	0	0	1	0	1	<30	≥17	Eutocia	1	-1.4	9.68	1	1.58	61.4	24.6	37.9	108
43	other	City	college	0	0	0	1	0	0	>30	13-16	Eutocia	0	0.25	28.78	0	1.57	54.6	22.15	31.1	78
43	Han	City	>post-graduate	0	1	0	1	0	1	>30	13-16	Caesarean	0	0.2	33.23	0	1.56	43.8	18	26.1	75
44	Han	City	senior	0	0	0	1	0	0	<30	13-16	Caesarean	0	-0.7	19.56	0	1.59	55.9	22.11	31.3	85
44	Han	City	college	0	0	0	1	0	0	>30	13-16	Eutocia	0	-0.22	9.23	1	1.59	57.7	22.82	32.1	90
44	other	City	>post-graduate	0	1	0	0	0	1	<30	13-16	Caesarean	1	-1.3	8.89	1	1.56	56.6	23.26	34.6	120
44	Han	City	>post-graduate	0	0	0	0	0	0	>30	13-16	Caesarean	0	-0.2	30.56	0	1.57	58.7	23.81	33.3	95
44	Zhuang	City	college	0	0	0	1	0	0	<30	13-16	Eutocia	0	-0.53	9.23	0	1.54	58.6	24.71	34.4	96
44	Han	City	senior	0	0	0	1	0	0	<30	13-16	Eutocia	0	-0.88	18.44	0	1.61	55.4	21.37	30.4	88
44	Han	City	college	0	0	0	1	1	0	<30	≤12	Caesarean	1	-1.3	17.34	0	1.54	49.9	21.04	26.2	89
44	Han	City	>post-graduate	0	0	0	1	0	0	>30	13-16	Eutocia	0	0.8	32.45	0	1.46	58.6	27.49	37.7	109
44	Han	City	college	0	0	0	1	0	0	<30	13-16	Caesarean	0	-0.45	18.67	0	1.57	56	22.72	32	94
44	Han	City	>post-graduate	0	0	0	1	0	0	>30	13-16	Eutocia	0	0.13	29.22	0	1.56	55.2	22.68	31.9	85
44	Han	City	>post-graduate	0	0	0	1	0	1	<30	≤12	Eutocia	0	0.3	18.98	0	1.55	54.7	22.77	32	88
44	other	City	college	0	0	0	0	0	0	<30	13-16	Eutocia	1	-2.4	9.87	0	1.52	50.7	21.94	30.5	96
44	Han	City	college	0	0	0	1	0	0	<30	13-16	Caesarean	0	-0.21	15.55	0	1.63	63.7	23.98	33.5	96
44	other	City	<junior	0	0	0	1	1	0	>30	≤12	Eutocia	0	-0.67	18.88	0	1.55	56.6	23.56	33	104
44	Han	rural	<junior	0	0	0	0	0	0	<30	13-16	Caesarean	1	-2.31	19.88	0	1.66	57.3	20.79	24.1	79
44	Han	City	college	0	1	0	1	0	0	<30	13-16	Eutocia	1	-2.1	17.76	0	1.71	68.2	23.32	35.1	109
44	other	City	>post-graduate	0	0	0	1	0	0	>30	≤12	Caesarean	0	0.23	28.12	0	1.54	66.4	28	38.3	112
44	Han	City	college	0	0	0	1	0	0	<30	13-16	Eutocia	0	-0.44	16.78	0	1.56	63.5	26.09	36	105
44	Han	City	senior	0	0	0	1	0	1	>30	13-16	Eutocia	0	-0.45	29.12	0	1.59	52	20.57	29.4	74
44	Han	City	college	0	0	0	0	0	0	<30	≤12	Eutocia	2	-2.9	8.38	0	1.58	62.1	24.88	35.6	126
45	other	City	senior	0	0	0	1	0	1	>30	≤12	Eutocia	0	0.33	15.56	1	1.61	58.8	22.68	32.2	102
45	Zhuang	City	>post-graduate	0	0	0	1	0	0	<30	13-16	Caesarean	0	0.45	12.34	0	1.49	56.9	25.63	35.7	102
45	Han	City	college	0	0	0	1	0	0	>30	≤12	Eutocia	0	0.21	25.12	0	1.56	58.6	24.08	33.8	96
45	other	City	<junior	0	0	0	1	1	1	>30	≤12	Caesarean	0	-0.49	11.22	0	1.66	52.4	19.02	27.8	78
45	Han	City	college	0	0	0	1	0	0	<30	13-16	Caesarean	0	-0.55	15.67	0	1.55	58.3	24.27	34.1	95
45	Han	City	>post-graduate	0	0	0	0	0	0	>30	13-16	Eutocia	0	0.77	19.79	0	1.56	52	21.37	30.6	88
46	Han	City	college	0	0	0	1	0	0	<30	≤12	Caesarean	0	-0.33	16.66	0	1.58	59.4	23.79	33.7	98
46	Han	City	senior	0	0	0	1	0	0	>30	13-16	Eutocia	0	-0.1	15.78	0	1.54	55.5	23.4	33.3	86
46	Han	City	college	0	0	0	1	0	0	<30	≥17	Caesarean	0	-0.39	8.76	0	1.57	54.1	21.95	31.5	98
46	other	City	>post-graduate	0	0	0	1	0	0	>30	13-16	Eutocia	0	1	30.78	0	1.56	54.2	22.27	31.9	96
46	Han	City	college	0	0	0	1	0	1	>30	13-16	Eutocia	0	-0.22	18.89	0	1.55	57.4	23.89	33.9	92
46	Han	City	<junior	0	0	0	1	0	0	<30	≤12	Caesarean	0	-0.56	19.34	0	1.57	58.3	23.65	33.6	112
46	other	City	college	0	0	0	1	1	1	>30	13-16	Eutocia	0	0.35	18.87	0	1.58	55.5	22.23	31.9	104
46	Han	City	college	0	0	0	1	0	0	>30	13-16	Eutocia	0	-0.3	23.39	1	1.67	50.7	18.18	27	96
46	Zhuang	City	>post-graduate	0	0	0	0	0	0	<30	≤12	Eutocia	1	-1.52	17.73	0	1.53	59.6	25.46	36.8	109
47	Han	rural	college	0	0	0	1	0	1	>30	13-16	Caesarean	0	0.26	26.33	0	1.56	58.7	24.12	34.4	89
47	other	City	>post-graduate	0	0	0	1	0	0	<30	13-16	Caesarean	0	0.1	17.34	0	1.46	56	26.27	36.9	104
47	Han	City	college	0	0	0	0	0	0	<30	≤12	Eutocia	2	-2.8	9.16	0	1.57	59.1	23.98	33.2	90
47	Han	City	senior	0	0	0	1	0	0	>30	13-16	Caesarean	0	0.11	13.33	0	1.57	54.5	22.11	31.9	94
47	Zhuang	City	college	0	1	0	1	0	0	<30	13-16	Eutocia	0	-0.2	12.24	0	1.56	54.5	22.39	32.3	98
47	Han	City	college	0	0	0	1	0	0	<30	13-16	Eutocia	0	-0.11	10.34	0	1.54	54.6	23.02	33	102
47	Han	City	college	0	0	0	1	0	1	>30	≥17	Eutocia	0	0.13	10.55	1	1.58	62.1	24.88	35.3	100
47	Han	City	college	0	0	0	1	0	1	>30	≤12	Caesarean	0	-0.79	8.55	0	1.56	56.6	23.26	33.3	104
47	Han	City	<junior	0	0	0	1	1	0	<30	13-16	Caesarean	0	-0.51	10.31	0	1.49	55	24.77	35.1	98
48	Han	City	college	0	0	0	1	0	0	<30	≤12	Caesarean	0	-0.2	10.88	0	1.55	59.8	24.89	35.5	98
48	other	City	college	0	0	0	1	0	0	<30	13-16	Eutocia	0	-0.12	6.36	0	1.56	50.8	20.87	30.7	92
48	Han	City	>post-graduate	1	0	0	0	0	1	>30	≤12	Caesarean	0	0.12	11.45	0	1.49	54.3	24.46	35	96
48	Han	City	>post-graduate	0	0	0	1	0	0	<30	13-16	Eutocia	0	0.33	17.89	0	1.53	49.2	21.02	30.9	93
48	Han	City	<junior	0	0	0	0	0	0	<30	13-16	Eutocia	2	-2.7	8.34	1	1.5	53.7	23.87	33.7	114
48	Han	City	college	0	0	0	1	0	0	<30	13-16	Caesarean	0	-0.12	18.22	0	1.57	50.4	20.45	30.2	91
48	Han	City	<junior	0	0	0	1	0	0	<30	≤12	Eutocia	0	-0.58	8.34	0	1.55	56.6	23.56	33.9	97
48	Han	City	college	0	0	0	1	1	1	>30	13-16	Caesarean	0	-0.5	37.23	1	1.56	58.2	23.92	34.3	94
48	Han	City	college	0	0	0	0	0	1	<30	13-16	Caesarean	0	-0.59	19.39	0	1.53	59	25.2	35.9	102
48	Zhuang	City	college	0	0	0	1	0	0	>30	≤12	Caesarean	0	0.33	26.88	0	1.56	57.8	23.75	34.1	98
48	Han	City	college	0	0	0	1	0	0	>30	13-16	Eutocia	0	0.21	29.12	1	1.53	53	22.64	32.8	102
48	other	City	senior	0	0	0	1	1	1	>30	≤12	Eutocia	0	0.1	18.67	0	1.52	57.6	24.93	35.6	96
48	Han	City	>post-graduate	0	0	0	1	0	0	<30	13-16	Caesarean	0	0.22	19.21	0	1.49	53.2	23.96	34.4	98
48	Zhuang	City	college	0	0	1	1	0	1	<30	13-16	Eutocia	0	-0.22	26.22	1	1.64	56.4	20.97	30.8	98
48	Han	City	college	0	0	0	0	0	1	>30	≤12	Eutocia	0	-0.8	26.33	0	1.61	55.3	21.33	31.2	89
48	Han	City	>post-graduate	0	0	0	1	0	0	<30	13-16	Caesarean	0	0.21	13.33	0	1.58	52	20.83	30.6	92
48	Han	City	senior	0	0	0	1	0	1	>30	≤12	Eutocia	0	-0.22	14.56	1	1.54	55.5	23.4	33.7	99
48	Han	City	college	0	0	0	1	0	0	<30	13-16	Caesarean	0	-0.32	17.78	0	1.56	56	23.01	33.3	104
48	Han	City	college	0	0	0	0	0	0	<30	13-16	Eutocia	1	-1.61	21.39	1	1.52	62.7	27.14	39.1	114
48	Han	City	college	0	0	0	0	0	1	>30	≤12	Eutocia	0	-0.5	19.23	0	1.57	55.7	22.6	32.8	102
49	other	City	>post-graduate	0	1	0	1	0	1	>30	13-16	Eutocia	0	0.29	8.89	1	1.55	51.5	21.44	31.6	96
49	Han	City	college	0	0	0	1	0	0	<30	≤12	Caesarean	0	-0.63	9.45	0	1.58	49.7	19.91	29.8	74
49	other	City	<junior	0	0	0	1	0	0	>30	13-16	Caesarean	0	0.2	36.21	0	1.67	64.9	23.27	33.8	98
49	Zhuang	City	college	0	0	0	0	0	0	>30	≤12	Caesarean	0	-0.98	12.22	0	1.61	60.7	23.42	34	100
49	Han	City	college	0	0	0	1	1	1	<30	13-16	Caesarean	0	-0.11	13.23	0	1.52	52.7	22.81	33.2	102
49	other	City	college	1	0	0	1	1	1	>30	13-16	Caesarean	0	0.3	34.55	1	1.55	44	18.31	27.8	72
49	Han	City	college	0	0	0	1	0	0	<30	≤12	Caesarean	0	0.78	17.89	0	1.54	50	21.08	31.2	94
49	Han	City	college	0	0	0	1	0	1	>30	13-16	Eutocia	0	-0.22	23.79	0	1.53	44.2	18.88	28.5	72
49	Han	City	college	0	0	0	1	0	1	<30	13-16	Eutocia	0	0.27	25.33	1	1.55	54	22.48	32.8	96
49	Zhuang	City	>post-graduate	0	0	0	1	0	1	<30	13-16	Caesarean	0	0.89	19.91	0	1.53	61	26.06	37.1	112
49	Han	City	<junior	0	0	0	0	0	0	<30	≤12	Caesarean	2	-3	9.56	0	1.56	59.1	24.29	34	129
49	other	City	<junior	0	0	0	1	0	1	>30	≥17	Eutocia	0	-0.34	19.33	1	1.44	60.8	29.32	41.1	134
49	Han	City	college	0	0	0	1	0	1	<30	≤12	Caesarean	0	-0.12	18.76	0	1.55	54	22.48	32.8	94
49	Han	City	college	0	0	0	1	0	1	>30	≤12	Eutocia	0	-0.71	27.64	0	1.56	55.8	22.93	33.4	102
49	other	City	college	0	0	0	1	0	1	>30	13-16	Eutocia	0	-0.8	22.22	1	1.48	53.9	24.61	35.4	102
49	Han	City	>post-graduate	0	0	0	0	0	0	<30	13-16	Caesarean	1	-2.2	8.78	0	1.47	57.3	26.52	38	121
49	Han	City	college	0	0	0	1	0	1	>30	≤12	Caesarean	0	-0.22	17.49	0	1.59	52	20.57	30.6	90
49	other	City	college	0	1	0	0	0	0	>30	13-16	Eutocia	2	-2.6	31.78	1	1.59	58.4	23.1	32.2	96
49	Zhuang	City	senior	0	0	0	0	1	1	<30	13-16	Caesarean	0	0.22	18.77	0	1.63	56	21.08	31.2	86
49	Han	City	>post-graduate	0	0	0	1	0	1	<30	13-16	Eutocia	0	0.88	19.22	0	1.64	54	20.08	30	84
49	other	City	senior	0	0	0	1	0	1	<30	13-16	Eutocia	0	-0.34	16.66	1	1.58	57.8	23.15	33.7	104
49	Han	City	>post-graduate	0	0	0	0	0	0	<30	≤12	Caesarean	1	-1.35	18.34	0	1.62	57.4	21.87	33.1	133
49	Han	City	college	0	0	0	1	0	0	>30	13-16	Eutocia	0	-0.95	23.34	0	1.55	59.4	24.72	35.5	90
50	Han	City	college	0	0	0	1	0	1	>30	13-16	Caesarean	0	-0.28	16.33	0	1.58	56.4	22.59	33.2	112
50	Han	rural	<junior	0	0	0	1	0	0	<30	≤12	Caesarean	1	-2.3	7.45	0	1.69	63	22.06	31	96
50	Zhuang	City	college	0	0	0	1	1	0	>30	≤12	Caesarean	1	-1.5	39.22	1	1.5	51.6	22.93	34.8	104
50	Han	rural	college	0	0	0	1	0	1	>30	13-16	Eutocia	0	0.1	17.72	1	1.59	55.5	21.95	32.4	100
50	Han	City	college	0	0	0	1	0	1	<30	13-16	Caesarean	0	0.22	18.23	0	1.57	56.2	22.8	33.5	108
50	Han	City	college	0	0	1	1	0	1	<30	13-16	Eutocia	0	0.51	7.98	1	1.62	58.3	22.21	32.8	98
50	Han	City	college	0	0	0	0	0	0	>30	13-16	Caesarean	0	-0.7	32.99	0	1.63	60.3	22.7	33.3	104
51	other	City	college	0	0	0	1	0	0	>30	13-16	Eutocia	0	-0.21	18.77	1	1.64	56	20.82	31.3	96
51	Han	City	<junior	0	0	0	1	0	1	<30	≤12	Eutocia	2	-2.8	8.99	0	1.53	57.9	24.73	36	131
51	Han	City	>post-graduate	0	0	0	0	0	1	<30	13-16	Eutocia	1	-1.2	19.34	1	1.58	55.8	22.35	36.2	102
51	Zhuang	City	college	0	0	0	1	1	0	<30	13-16	Eutocia	0	0.23	19.33	0	1.58	60	24.03	35.2	98
51	Han	City	senior	0	0	0	0	0	1	>30	13-16	Caesarean	0	-0.68	26.12	0	1.56	58.5	24.04	35.2	96
51	Han	City	college	0	0	0	1	0	0	<30	≤12	Eutocia	0	-0.5	18.65	0	1.57	59.4	24.1	35.2	102
51	Han	City	>post-graduate	0	0	0	0	0	0	<30	13-16	Caesarean	1	-1.4	16.65	0	1.62	57.1	21.76	34	110
51	Han	City	college	0	0	0	1	0	1	>30	13-16	Eutocia	0	0.1	28.23	1	1.58	63.6	25.48	36.9	103
51	Han	City	college	0	0	0	1	0	1	>30	≤12	Eutocia	0	-0.22	21.12	0	1.59	62	24.52	35.8	110
51	other	City	college	0	1	0	1	0	1	<30	13-16	Eutocia	0	-0.26	15.64	1	1.58	59.8	23.95	35.1	108
51	Han	City	college	0	0	0	0	0	0	<30	13-16	Caesarean	0	-0.62	9.68	0	1.55	58.7	24.43	35.6	112
52	Zhuang	rural	<junior	0	0	0	1	1	1	>30	13-16	Eutocia	0	0.1	35.21	1	1.58	58	23.23	34.4	98
52	Han	City	>post-graduate	0	0	0	1	0	0	<30	13-16	Eutocia	0	0.5	14.44	0	1.58	58.9	23.59	34.9	96
52	Han	City	college	1	0	0	0	0	1	>30	13-16	Eutocia	1	-1.5	8.88	1	1.6	62.7	24.49	37.3	119
52	Han	City	college	0	0	0	0	1	0	>30	13-16	Eutocia	0	-0.32	14.34	0	1.55	57.7	24.02	35.4	98
52	Han	rural	<junior	0	0	0	1	0	1	<30	≤12	Eutocia	2	-2.7	9.45	0	1.52	48.4	20.95	28	91
52	Han	City	college	0	0	0	0	0	1	>30	13-16	Caesarean	0	-0.33	20.34	0	1.59	58.2	23.02	34.2	96
52	other	City	college	0	0	0	1	0	1	<30	13-16	Caesarean	0	-0.11	17.71	1	1.53	60	25.63	37.3	101
52	Han	City	college	0	0	0	1	0	0	<30	13-16	Caesarean	0	0.1	18.33	0	1.5	49	21.78	32.7	92
52	Han	City	college	0	0	0	1	0	0	>30	≤12	Eutocia	1	-2.32	17.23	1	1.52	57.4	24.84	36.7	102
52	Han	City	college	0	0	0	1	0	0	<30	13-16	Eutocia	0	0.13	19.77	0	1.58	51.7	20.71	31.4	94
52	Han	City	senior	0	0	0	1	0	1	>30	≤12	Caesarean	1	-1.51	20.55	0	1.57	54.8	22.23	35.1	116
52	Zhuang	City	senior	0	0	0	0	0	1	<30	13-16	Eutocia	1	-1.7	9.45	1	1.52	55.4	23.98	37.1	120
52	Han	City	college	0	0	0	0	0	0	<30	13-16	Eutocia	0	-0.4	13.44	0	1.67	59.4	21.3	32.1	100
52	Han	City	college	0	0	0	1	0	1	>30	13-16	Eutocia	0	0.5	22.89	1	1.45	50	23.78	35.1	101
52	Zhuang	City	college	0	0	0	1	0	0	<30	13-16	Eutocia	0	0.12	23.78	1	1.59	54.4	21.52	32.4	102
52	other	City	college	0	0	0	1	0	1	>30	13-16	Eutocia	0	0.27	16.66	1	1.56	60	24.65	36.1	106
52	other	City	<junior	0	0	0	1	0	0	>30	13-16	Eutocia	2	-3	19.15	0	1.54	56.5	23.82	34.1	118
52	Han	City	college	0	0	0	1	0	1	<30	13-16	Eutocia	1	-1.8	9.3	1	1.53	57	24.35	36.2	112
52	Han	rural	college	0	0	0	0	1	1	>30	13-16	Eutocia	0	0.4	30.23	1	1.59	61.5	24.33	35.8	99
52	Han	City	college	0	0	0	0	0	1	<30	13-16	Caesarean	1	-1.9	8.8	0	1.54	60.8	25.64	36.9	109
52	Han	City	>post-graduate	0	0	0	1	0	0	>30	13-16	Eutocia	0	0.3	5.34	1	1.61	58	22.38	33.4	96
52	Zhuang	City	college	0	1	0	1	0	1	<30	13-16	Eutocia	0	0.3	24.79	1	1.6	58.4	22.81	33.9	98
52	Han	City	college	0	0	0	1	0	1	>30	≤12	Eutocia	0	0.2	21.56	0	1.56	59	24.24	35.7	102
52	Han	City	college	0	0	0	1	0	1	>30	13-16	Caesarean	0	-0.6	30.34	0	1.58	55	22.03	33	101
52	Han	City	college	0	0	0	1	0	1	>30	≤12	Eutocia	1	-2	18.88	1	1.55	61.6	25.64	37.7	113
52	Han	City	college	1	0	0	1	0	1	>30	13-16	Eutocia	0	0.45	18.11	1	1.56	59	24.24	35.7	106
52	other	City	senior	0	0	0	0	0	0	<30	13-16	Caesarean	1	-2.45	17.22	0	1.61	64	24.69	36.8	113
52	Han	City	<junior	0	0	0	0	0	0	>30	13-16	Eutocia	2	-2.6	9.53	1	1.55	59.6	24.81	36.1	137
53	Zhuang	City	college	0	0	1	1	0	1	<30	13-16	Eutocia	0	0.41	23.99	1	1.58	60.9	24.4	36.1	102
53	Han	City	college	0	0	0	1	0	0	<30	13-16	Eutocia	2	-2.9	7.56	0	1.53	55.4	23.67	34	119
53	Han	City	college	0	0	0	1	1	1	<30	13-16	Eutocia	0	0.44	18.23	0	1.49	50	22.52	33.8	86
53	other	City	senior	0	0	0	1	1	1	>30	13-16	Eutocia	1	-2.3	33.25	1	1.53	53.3	22.77	34.6	109
53	other	City	>post-graduate	0	0	0	1	0	0	>30	≤12	Caesarean	0	0.21	17.34	0	1.55	58	24.14	35.8	89
53	Han	rural	college	0	0	0	0	0	1	<30	13-16	Eutocia	0	-0.4	26.77	1	1.59	57.5	22.74	34.1	90
53	Han	City	college	0	0	0	0	0	0	<30	13-16	Eutocia	1	-2.22	25.55	0	1.59	54	21.36	28	85
53	Zhuang	City	college	0	0	0	1	0	1	>30	13-16	Eutocia	0	0.33	18.99	1	1.59	64	25.32	37.2	100
53	Han	City	college	0	0	0	0	0	1	>30	13-16	Eutocia	0	-0.35	28.53	1	1.57	54.6	22.15	33.4	103
53	Han	City	college	0	0	0	1	0	0	<30	13-16	Eutocia	1	-2.02	26.33	1	1.7	68	23.53	36	100
53	Han	City	college	0	0	0	1	0	1	<30	13-16	Caesarean	0	0.11	12.34	0	1.65	50.7	18.62	29.1	72
53	Zhuang	City	college	0	0	0	0	1	1	>30	13-16	Eutocia	0	-0.1	38.22	1	1.49	52	23.42	34.9	92
53	Han	City	>post-graduate	0	0	0	1	0	1	>30	≤12	Caesarean	1	-2.1	9.78	1	1.53	56	23.92	36.8	102
54	other	rural	college	0	0	1	1	0	1	<30	13-16	Eutocia	0	-0.11	25.34	1	1.5	67.5	30	43	135
54	Han	City	<junior	0	0	0	1	0	0	>30	13-16	Caesarean	1	-1.6	37.65	0	1.53	62	26.49	38.1	122
54	Han	City	college	0	0	0	1	0	0	>30	13-16	Eutocia	0	0.2	21.66	1	1.6	54	21.09	32.3	104
54	other	City	college	1	0	0	1	0	1	<30	≤12	Eutocia	1	-2.21	13.41	1	1.54	56.6	23.87	35.9	105
54	other	City	<junior	0	0	0	1	1	1	>30	13-16	Eutocia	0	-1	34.88	1	1.48	50	22.83	34.4	94
54	Zhuang	City	college	0	0	0	1	0	1	<30	13-16	Eutocia	1	-2.2	6.33	1	1.51	52.8	23.16	33.8	127
54	Han	City	college	0	0	0	1	0	0	<30	13-16	Caesarean	1	-2.11	18.23	0	1.58	64	25.64	38.3	113
54	Han	City	college	0	0	0	1	1	0	>30	13-16	Eutocia	0	0.8	35.78	1	1.55	56.8	23.64	35.4	98
54	Han	City	<junior	0	0	0	1	0	1	<30	13-16	Caesarean	0	-0.92	8.36	0	1.56	59	24.24	36.1	107
54	other	City	senior	0	0	0	1	0	1	<30	13-16	Eutocia	0	-0.3	9.89	1	1.53	60.6	25.89	38.1	106
54	Han	City	>post-graduate	0	0	0	1	0	0	>30	13-16	Caesarean	1	-1.32	19.22	0	1.57	58	23.53	35.7	93
54	Han	City	college	0	0	0	0	0	1	>30	13-16	Eutocia	0	0.1	27.67	1	1.56	62	25.48	37.6	110
54	Han	City	college	0	0	0	1	1	1	<30	13-16	Eutocia	1	-1.26	12.21	1	1.54	58.2	24.54	36.2	108
54	Han	City	<junior	0	0	0	0	0	0	<30	13-16	Caesarean	1	-2.1	11.11	0	1.53	55.3	23.62	33.1	89
54	Han	City	college	0	0	0	0	0	1	<30	13-16	Caesarean	2	-2.5	9.58	0	1.56	57.5	23.63	34.4	123
54	Zhuang	City	college	0	0	0	1	0	0	>30	13-16	Eutocia	0	0.17	11.99	1	1.61	63	24.3	36.2	105
54	Han	City	college	0	0	0	0	0	1	<30	13-16	Eutocia	0	-0.5	27.56	1	1.58	54.7	21.91	33.3	108
54	Han	City	>post-graduate	0	0	0	1	0	0	>30	13-16	Eutocia	0	0.2	8.64	1	1.6	52	20.31	31.4	98
54	Zhuang	City	college	0	0	0	1	0	1	<30	≤12	Eutocia	1	-2.2	19.02	1	1.58	55.6	22.27	34	114
54	other	City	<junior	0	0	0	1	0	0	>30	13-16	Eutocia	0	-0.22	28.88	0	1.58	59.6	23.87	35.7	96
54	Han	City	college	0	0	0	1	1	0	>30	13-16	Eutocia	0	-0.3	34.66	1	1.56	61.7	25.35	37.4	103
54	Han	City	college	0	0	0	0	0	1	>30	≤12	Caesarean	1	-1.7	38.54	0	1.61	52.6	20.29	28.2	97
54	Han	City	college	0	0	0	0	0	1	<30	13-16	Eutocia	0	-0.12	17.72	1	1.54	56	23.61	35.4	102
54	Han	rural	<junior	1	0	0	1	0	0	<30	13-16	Eutocia	0	-0.8	18.9	1	1.61	48.5	18.71	29.5	74
54	Han	City	college	0	1	0	0	0	1	<30	13-16	Eutocia	0	-0.89	17.34	1	1.59	55	21.76	33.1	108
54	Han	City	college	0	0	0	0	1	1	<30	13-16	Caesarean	1	-1.77	18.81	1	1.55	45.9	19.11	27.2	90
54	Han	City	college	0	0	0	1	0	1	<30	13-16	Eutocia	0	0.25	26.89	1	1.61	52	20.06	31.1	94
54	Han	City	college	0	0	0	1	0	1	>30	13-16	Eutocia	0	0.12	26.67	1	1.54	54.7	23.06	34.7	94
54	Han	City	senior	0	0	0	0	0	0	<30	13-16	Eutocia	2	-2.9	9.46	1	1.49	57.3	25.81	37	139
54	other	City	college	0	0	0	1	1	1	>30	13-16	Eutocia	0	0.4	39.11	1	1.55	62	25.81	38	112
54	Han	City	college	0	0	0	0	0	1	<30	13-16	Eutocia	1	-1.58	25.89	1	1.42	42	20.83	34.8	114
54	Han	City	college	0	0	0	1	0	1	>30	≤12	Eutocia	1	-1.82	18.33	1	1.57	56.1	22.76	35.1	129
54	Han	City	college	0	0	0	1	1	1	<30	13-16	Eutocia	0	-0.22	17.32	1	1.57	60	24.34	36.2	107
54	Zhuang	City	college	0	0	0	1	0	0	>30	13-16	Eutocia	0	0.4	7.65	1	1.57	58	23.53	35.3	102
54	Han	City	college	0	0	0	0	0	1	<30	13-16	Eutocia	0	-0.61	29.99	1	1.54	59.8	25.22	37.3	110
54	Han	City	<junior	1	0	0	0	0	1	>30	13-16	Eutocia	1	-1.4	8.34	1	1.54	58	24.46	30.4	94
54	Han	City	college	0	0	0	1	0	1	<30	≥17	Caesarean	1	-1.4	23.33	1	1.58	52.1	20.87	29.8	97
54	Han	City	college	0	0	1	1	0	1	<30	13-16	Eutocia	0	-0.12	18.22	1	1.54	59	24.88	36.9	126
54	Han	City	college	0	0	0	1	1	1	>30	13-16	Eutocia	0	1	40.78	1	1.57	61.1	24.79	36.8	123
54	Han	rural	<junior	0	0	0	0	0	0	>30	13-16	Eutocia	2	-2.8	28.66	1	1.5	53.3	23.69	34.8	121
55	Zhuang	City	college	0	0	0	1	0	1	<30	13-16	Eutocia	0	-0.33	17.31	1	1.59	60	23.73	35.7	98
55	Han	City	senior	0	1	0	1	0	1	>30	13-16	Caesarean	0	0.22	8.22	1	1.57	61.4	24.91	37.1	108
55	Han	City	college	0	0	0	1	1	1	<30	13-16	Eutocia	1	-1.22	21.88	1	1.55	49.7	20.69	31	121
55	Han	City	college	0	0	0	0	0	1	>30	13-16	Eutocia	0	-0.32	16.32	1	1.53	56	23.92	36	109
55	Han	City	senior	1	0	0	1	0	1	<30	13-16	Eutocia	1	-1.6	9.56	1	1.6	55.7	21.76	30.5	92
55	Han	City	college	0	0	0	0	0	0	>30	≥17	Eutocia	2	-2.8	9.67	1	1.51	56.1	24.6	35.9	129
55	Han	City	college	0	0	0	1	1	1	<30	13-16	Caesarean	0	0.8	38.77	1	1.46	57	26.74	39.3	124
55	Zhuang	City	>post-graduate	0	0	0	0	0	1	<30	13-16	Eutocia	0	0.1	17.34	1	1.44	53.7	25.9	38.3	130
55	Han	City	college	0	0	0	1	0	0	<30	13-16	Eutocia	1	-1.33	23.78	1	1.67	64	22.95	33.9	116
55	Han	rural	college	0	0	0	1	0	1	<30	13-16	Eutocia	0	-0.28	18.56	1	1.55	55.4	23.06	34.9	109
55	other	City	college	0	0	0	0	0	1	<30	13-16	Caesarean	1	-1.5	8.34	1	1.54	56	23.61	36.7	128
55	Han	City	college	0	0	1	1	1	0	<30	≤12	Eutocia	1	-1.2	34.74	1	1.55	57.6	23.98	36.1	112
55	Han	City	college	0	0	0	1	0	1	<30	13-16	Caesarean	1	-1.27	22.77	1	1.66	59.1	21.45	32.1	94
55	Han	City	college	0	0	0	1	0	1	>30	13-16	Eutocia	0	-0.32	19.22	1	1.59	60.3	23.85	35.9	102
55	Han	City	college	0	0	0	1	0	1	<30	≥17	Eutocia	0	0.22	21.88	1	1.61	61	23.53	35.5	108
55	Han	City	<junior	0	0	0	0	1	0	>30	13-16	Eutocia	1	-1.5	33.33	1	1.63	58.7	22.09	33.9	114
55	Zhuang	City	college	0	0	0	1	0	1	<30	13-16	Eutocia	0	-0.23	13.33	1	1.7	70.1	24.26	36.4	109
55	Han	City	college	1	0	0	0	0	0	>30	13-16	Caesarean	2	-2.7	30.23	1	1.56	61.5	25.27	36.8	134
55	Han	City	college	0	0	0	1	0	1	>30	13-16	Eutocia	0	0.34	26.89	1	1.56	59.3	24.37	36.5	103
55	Han	City	college	0	0	0	1	0	1	<30	≥17	Eutocia	0	-0.4	8.89	1	1.59	60.4	23.89	35.9	106
55	Han	City	college	0	0	0	0	1	1	>30	≥17	Caesarean	1	-1.3	30.67	1	1.56	56.3	23.13	35.1	114
55	Han	City	senior	0	0	0	1	0	1	<30	13-16	Eutocia	1	-1.2	17.78	1	1.52	56.6	24.5	36.3	113
55	Han	City	college	0	0	0	1	0	1	>30	13-16	Eutocia	0	-0.1	23.33	1	1.58	57	22.83	34.6	112
55	Zhuang	City	college	0	0	0	1	0	1	<30	≥17	Eutocia	0	-0.33	17.99	1	1.49	48	21.62	33.2	102
55	Han	City	senior	0	0	0	0	1	1	<30	13-16	Caesarean	0	-0.4	28.89	1	1.43	54	26.41	38.9	102
55	Han	City	college	0	0	0	1	0	1	>30	13-16	Eutocia	0	-0.6	9.88	1	1.56	53	21.78	33.4	108
55	Han	City	college	0	0	0	1	0	1	>30	13-16	Eutocia	0	-0.2	18.23	1	1.52	56	24.24	36.3	104
55	Han	rural	college	0	0	0	0	0	1	<30	13-16	Caesarean	1	-1.23	19.99	1	1.55	57.6	23.98	35.7	118
55	Han	City	college	1	0	0	1	0	1	>30	13-16	Eutocia	0	0.1	19.33	1	1.52	60.5	26.19	38.7	107
55	Zhuang	City	college	0	0	0	1	0	1	<30	13-16	Eutocia	1	-1.9	8.33	1	1.56	59.5	24.45	36.3	122
55	Han	City	college	0	0	0	0	1	1	<30	13-16	Caesarean	0	0.5	35.77	1	1.59	52.6	20.81	32.2	96
55	Han	City	college	0	0	0	1	0	1	<30	13-16	Eutocia	0	-0.8	6.66	1	1.55	59.5	24.77	37	109
55	other	City	<junior	0	0	0	0	0	1	>30	13-16	Eutocia	1	-1.3	8.35	1	1.55	61.6	25.64	37.3	130
55	Han	City	college	0	0	0	1	1	1	<30	13-16	Caesarean	0	0.33	27.76	1	1.58	60	24.03	36.1	103
55	Han	City	college	0	0	0	1	0	1	<30	13-16	Eutocia	0	0.34	26.67	1	1.54	58.4	24.62	36.8	120
55	Han	City	college	0	0	0	1	0	1	<30	≥17	Eutocia	0	-0.3	19.56	1	1.56	59.2	24.33	36.4	112
55	Zhuang	City	senior	0	0	0	1	0	1	<30	13-16	Caesarean	1	-1.8	9.66	1	1.59	61.4	24.29	36.2	110
55	Han	City	college	0	0	0	0	0	1	<30	13-16	Eutocia	0	-0.4	8.67	1	1.58	60.5	24.23	36.3	112
56	Han	City	college	0	0	0	1	0	1	>30	13-16	Caesarean	0	-0.21	25.54	1	1.55	56.5	23.52	35.7	98
56	Han	rural	college	0	0	0	0	1	1	<30	13-16	Eutocia	1	-1.56	29.11	1	1.5	56.5	25.11	37.1	138
56	Han	City	senior	0	0	0	1	0	1	>30	13-16	Caesarean	1	-1.6	9.32	1	1.58	57	22.83	32	94
56	other	City	college	0	0	0	1	0	1	<30	13-16	Eutocia	0	-0.5	15.45	1	1.58	60	24.03	36.3	107
56	Han	City	college	1	0	0	0	1	1	>30	13-16	Caesarean	0	0.8	32.41	1	1.63	51.3	19.31	30.6	94
56	Han	City	college	0	0	0	1	0	1	<30	13-16	Eutocia	0	-0.5	5.35	1	1.59	53.9	21.32	33.1	108
56	other	City	college	0	0	0	1	0	1	<30	13-16	Caesarean	1	-1.56	15.29	1	1.6	55.9	21.84	33	89
56	Han	City	college	0	0	0	0	1	1	>30	≥17	Eutocia	0	-0.2	33.78	1	1.61	56.8	21.91	33.8	96
56	Han	City	senior	0	0	0	1	0	1	>30	13-16	Eutocia	0	-0.89	14.23	1	1.54	55.6	23.44	35.6	102
56	Han	City	>post-graduate	0	0	0	1	1	0	<30	13-16	Caesarean	1	-1.1	16.31	0	1.61	64.3	24.81	38	137
56	Zhuang	City	college	0	0	0	1	0	1	<30	13-16	Eutocia	1	-1.8	27.57	1	1.62	57.2	21.8	34.8	109
56	Han	City	college	0	0	0	1	1	1	>30	13-16	Eutocia	0	-0.7	37.12	1	1.62	54.5	20.77	32.4	104
56	Han	City	college	0	0	0	0	0	1	<30	13-16	Eutocia	0	-0.32	26.66	1	1.57	57.6	23.37	35.5	100
56	Han	rural	<junior	0	0	1	1	0	1	>30	13-16	Caesarean	1	-1.9	6.98	1	1.56	61.6	25.31	37.9	110
56	Han	City	college	0	0	0	0	0	1	<30	≥17	Eutocia	0	0.3	9.45	1	1.59	60.2	23.81	36.1	121
56	Han	City	college	0	0	0	1	1	1	>30	13-16	Caesarean	0	-1	38.56	1	1.53	62.8	26.83	39.7	109
56	Han	City	senior	0	0	0	1	0	1	<30	13-16	Eutocia	1	-1.4	8.12	1	1.54	54.9	23.15	34.7	99
56	Han	City	college	0	0	0	0	1	1	>30	≥17	Caesarean	1	-1.1	32.21	1	1.53	59.4	25.37	37.6	109
56	Han	City	senior	0	0	0	1	0	1	<30	13-16	Eutocia	0	-0.7	13.33	1	1.54	54.4	22.94	35	98
56	other	City	college	0	0	0	1	0	1	>30	13-16	Eutocia	1	-1.8	9.78	1	1.52	55.9	24.19	36.4	100
56	Han	City	college	0	0	0	0	1	1	<30	13-16	Caesarean	0	0.6	36.44	1	1.57	51	20.69	32.3	109
56	Han	City	college	0	0	0	1	0	1	<30	13-16	Eutocia	1	-2.1	8.24	1	1.51	56	24.56	36.1	125
56	Han	City	college	0	0	0	1	0	1	>30	13-16	Eutocia	0	0.33	25.34	1	1.59	59.4	23.5	35.7	102
56	Han	City	senior	0	0	0	0	0	1	<30	13-16	Eutocia	1	-1.4	18.89	1	1.53	56.3	24.05	30.1	98
57	Zhuang	City	college	0	0	0	0	1	1	>30	≥17	Caesarean	0	0.9	37.12	1	1.58	57.3	22.95	35.3	104
57	Han	City	college	0	0	0	1	0	1	>30	13-16	Eutocia	0	-0.21	9.78	1	1.55	60.2	25.06	37.8	120
57	Han	City	senior	0	0	0	1	1	1	<30	13-16	Eutocia	1	-1.1	22.22	1	1.61	59.1	22.8	38.1	135
57	Han	City	college	0	0	0	0	0	1	>30	≥17	Caesarean	0	-0.2	19.46	1	1.49	50.2	22.61	34.8	95
57	Han	City	college	0	0	0	1	0	0	<30	13-16	Eutocia	1	-2.3	24.34	0	1.65	62.3	22.88	29	96
57	Zhuang	City	college	0	0	0	1	0	1	<30	13-16	Eutocia	1	-2.2	8.33	1	1.58	45.9	18.39	27	90
57	Han	rural	<junior	0	0	0	1	1	1	<30	13-16	Caesarean	0	0.1	28.83	1	1.43	52.6	25.72	38.6	112
57	Han	City	college	0	0	0	0	0	1	<30	13-16	Eutocia	0	-0.7	8.45	1	1.7	51	17.65	28.9	76
57	Han	City	college	0	0	0	1	0	1	>30	≥17	Eutocia	0	0.11	8.75	1	1.67	59.5	21.33	33.3	106
58	other	City	senior	0	0	1	0	0	1	<30	13-16	Caesarean	0	-0.52	9.32	1	1.48	57	26.02	39.2	128
58	Han	City	college	0	0	0	1	0	1	<30	13-16	Eutocia	0	-0.88	18.34	1	1.57	60.1	24.38	37.2	113
58	Han	City	senior	0	0	0	1	0	1	>30	≥17	Caesarean	1	-2.3	9.45	1	1.53	50	21.36	30.2	88
58	Zhuang	City	college	0	0	0	0	1	1	<30	13-16	Eutocia	1	-1.66	23.32	1	1.53	56.7	24.22	37.1	123
58	Han	City	senior	0	0	0	1	0	1	>30	13-16	Caesarean	0	0.21	9.12	1	1.58	56	22.43	34.9	113
58	Han	City	college	0	0	0	0	0	1	<30	13-16	Eutocia	1	-1.56	17.32	1	1.56	56.4	23.18	35.1	110
59	other	City	<junior	0	0	0	1	0	1	<30	13-16	Eutocia	1	-2.1	8.35	1	1.55	54	22.48	29.9	88
59	Han	City	college	0	0	1	0	0	1	<30	≥17	Caesarean	1	-2.4	9.22	1	1.58	52.4	20.99	37.6	131
59	other	City	college	0	0	0	1	0	1	<30	13-16	Caesarean	0	-0.25	16.66	1	1.6	50	19.53	31.6	84
60	Han	City	college	0	0	0	1	0	1	<30	13-16	Eutocia	1	-1.1	8.69	1	1.6	59.1	23.09	30.2	98
